# Supplementary material for: Random forest-based modelling to detect biomarkers for prostate cancer progression
Source: PubMed Central journal article supplement (PMC6805338; doi:10.1186/s13148-019-0736-8), 2019-10-22
Supplement: 13148_2019_736_MOESM3_ESM.pdf [file 13148_2019_736_MOESM3_ESM.pdf]

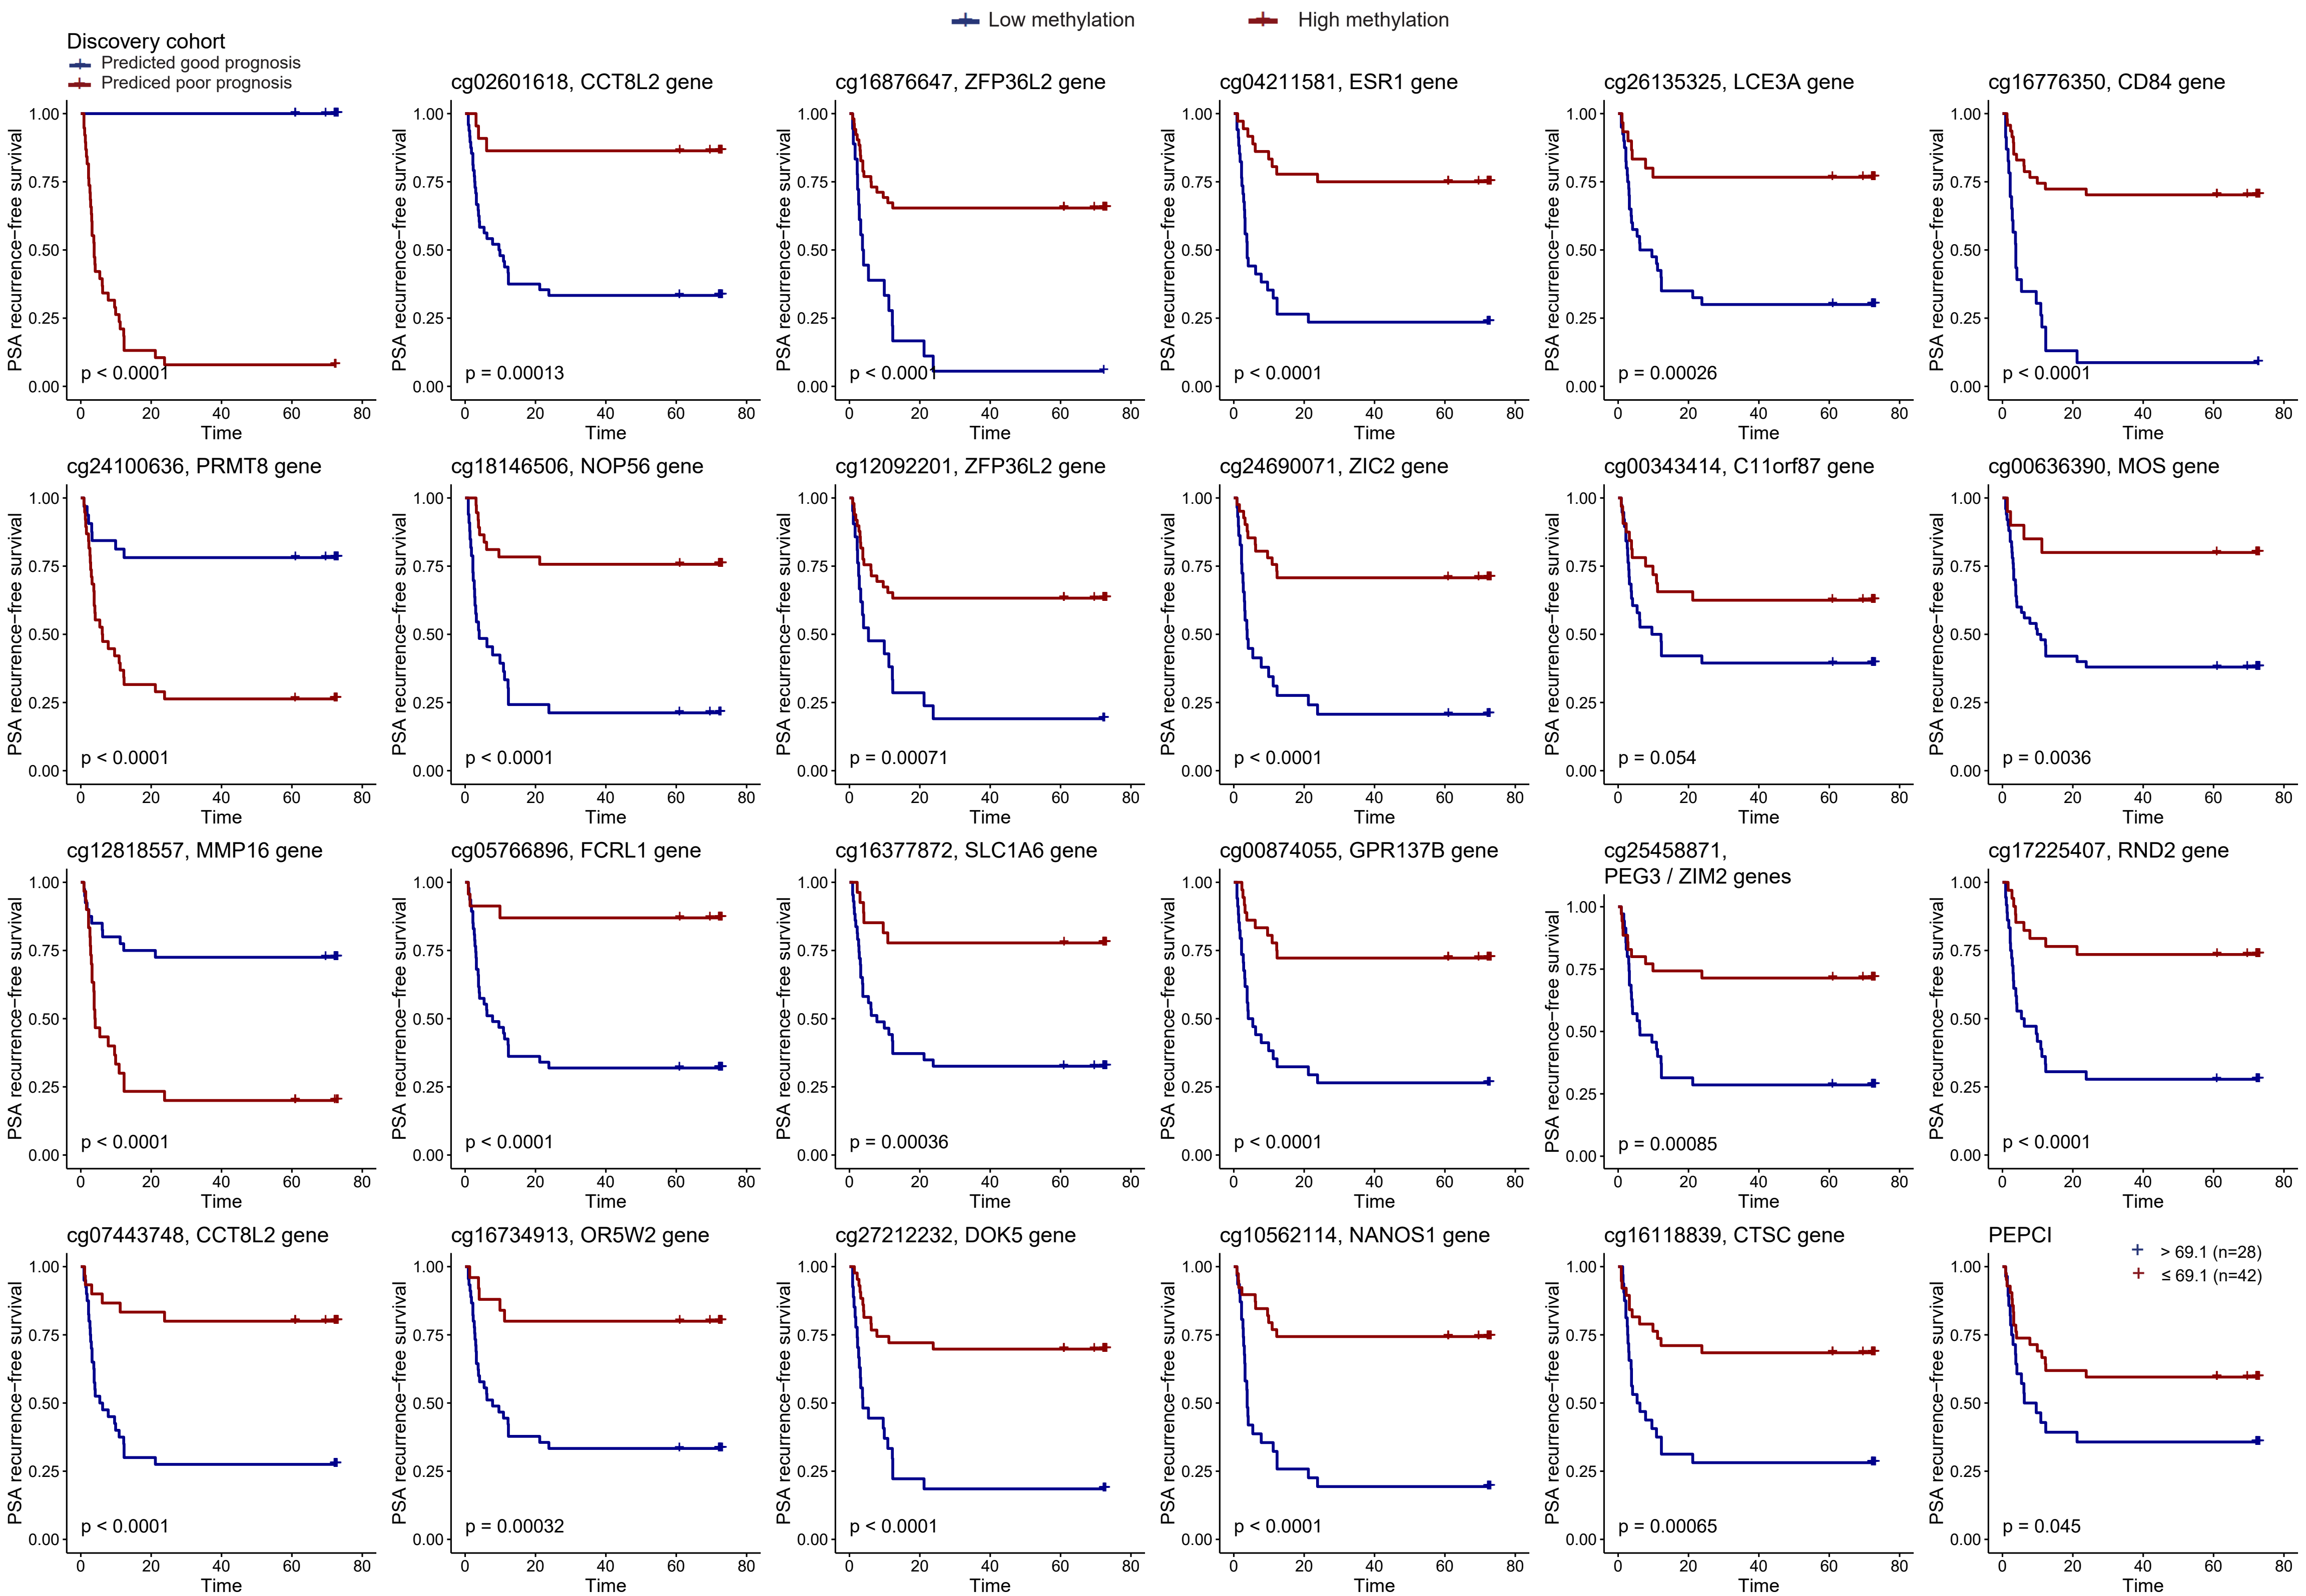

**Figure S1:** Individual Kaplan-Meier curves. Predictive power for PSA recurrence-free survival of the full classifier, PEPICI, and individual candidate CpG sites associated with the top20 selected genes in the discovery cohort (n=70). p values from log-rank test. Red: high methylation (above median), blue: low methylation (below median).
