# Supplementary material for: Random forest-based modelling to detect biomarkers for prostate cancer progression
Source: PubMed Central journal article supplement (PMC6805338; doi:10.1186/s13148-019-0736-8), 2019-10-22
Supplement: 13148_2019_736_MOESM7_ESM.pdf [file 13148_2019_736_MOESM7_ESM.pdf]

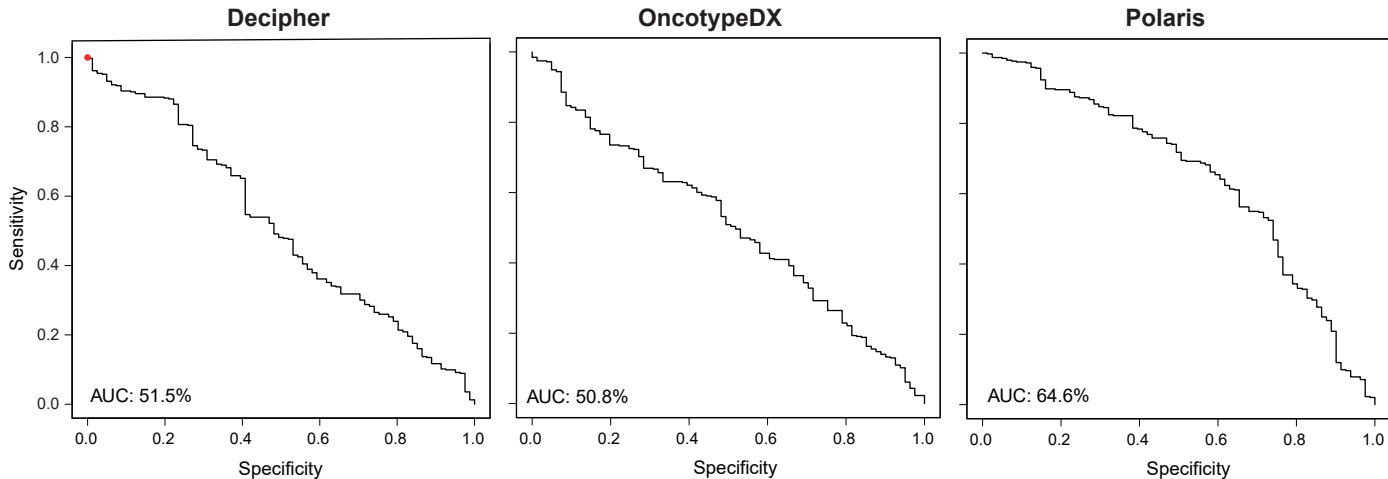

**Figure S5:** Specificity and sensitivity of gene expression-based prognostic tests to prognosticate PSA-based BCR for the TCGA PRAD cohort. Sums of Z-scores of RNA-seq-derived gene expression per patient was used for calculations of risk scores, as described in Ref. [42].
