# Supplementary material for: Random forest-based modelling to detect biomarkers for prostate cancer progression
Source: PubMed Central journal article supplement (PMC6805338; doi:10.1186/s13148-019-0736-8), 2019-10-22
Supplement: 13148_2019_736_MOESM8_ESM.pdf [file 13148_2019_736_MOESM8_ESM.pdf]

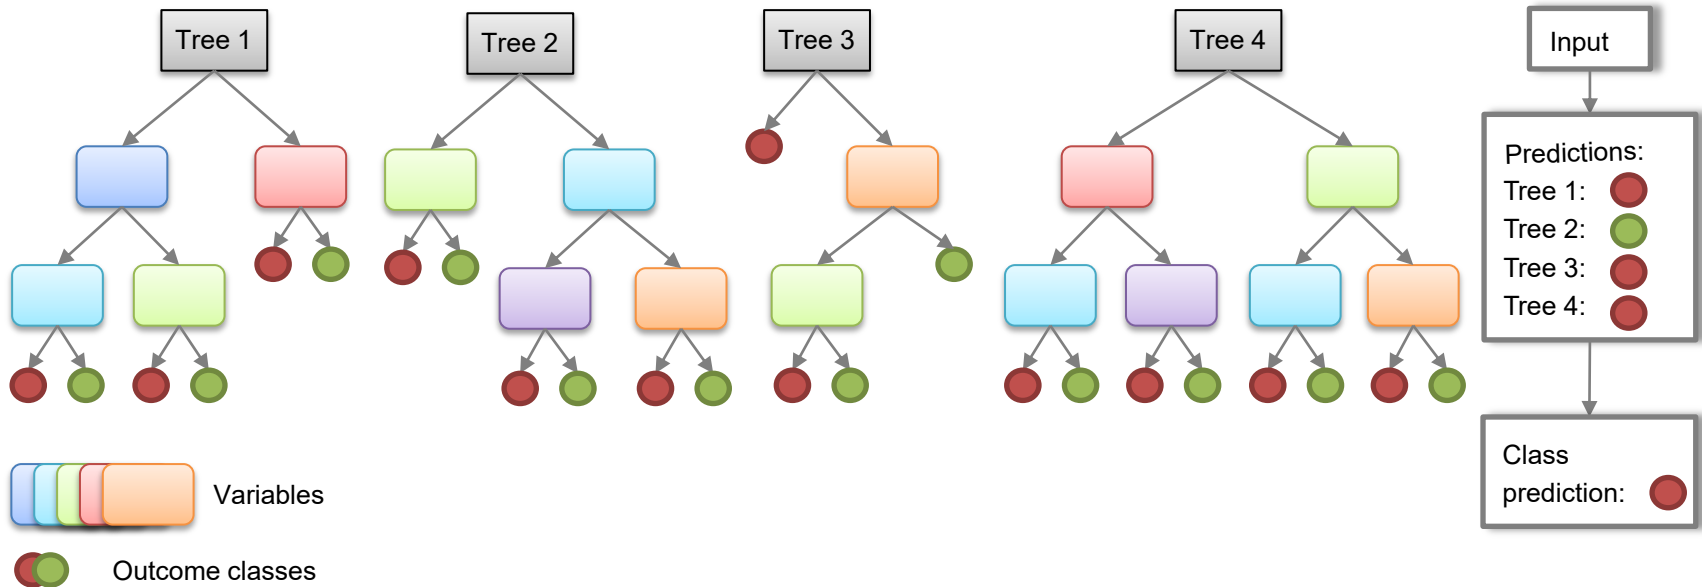

**Figure S5:** Schematic representation of the random forest model
