# Supplementary material for: Random forest-based modelling to detect biomarkers for prostate cancer progression
Source: PubMed Central journal article supplement (PMC6805338; doi:10.1186/s13148-019-0736-8), 2019-10-22
Supplement: 13148_2019_736_MOESM9_ESM.pdf [file 13148_2019_736_MOESM9_ESM.pdf]

**Table S3: Pathological and clinical data of the arrayed prostate****cancers**

Percent in the column "Study cohort on TMA" refers to the fraction of samples across each category. Percent in column "Biochemical relapse among categories" refers to the fraction of samples with biochemical relapse within each parameter in the different categories.

|                                 | No. of patients (%)              |                                         |
|---------------------------------|----------------------------------|-----------------------------------------|
|                                 | Study cohort on TMA<br>(n=17747) | Biochemical relapse among<br>categories |
| <b>Follow-up (months)</b>       |                                  |                                         |
| n                               | 14464 (81.5%)                    | 3612 (25%)                              |
| Mean                            | 56.3                             | -                                       |
| Median                          | 48                               | -                                       |
| <b>Age (years)</b>              |                                  |                                         |
| ≤50                             | 433 (2.4%)                       | 66 (15.2%)                              |
| 51-59                           | 4341 (24.5%)                     | 839 (19.3%)                             |
| 60-69                           | 9977 (56.4%)                     | 2073 (20.8%)                            |
| ≥70                             | 2936 (16.6%)                     | 634 (21.6%)                             |
| <b>Pretreatment PSA (ng/ml)</b> |                                  |                                         |
| <4                              | 2225 (12.6%)                     | 313 (14.1%)                             |
| ≥4-10                           | 10520 (59.6%)                    | 1696 (16.1%)                            |
| ≥10-20                          | 3662 (20.8%)                     | 1043 (28.5%)                            |
| >20                             | 1231 (7%)                        | 545 (44.3%)                             |
| <b>pT stage (AJCC 2002)</b>     |                                  |                                         |
| pT2                             | 11518 (65.2%)                    | 1212 (10.5%)                            |
| pT3a                            | 3842 (21.7%)                     | 1121 (29.2%)                            |
| pT3b                            | 2233 (12.6%)                     | 1213 (54.3%)                            |
| pT4                             | 85 (0.5%)                        | 63 (74.1%)                              |
| <b>Gleason grade</b>            |                                  |                                         |
| ≤3+3                            | 3570 (18.1%)                     | 264 (7.4%)                              |
| 3+4                             | 9336 (47.4%)                     | 1436 (15.4%)                            |
| 3+4 Tert.5                      | 1697 (8.6%)                      | 165 (9.7%)                              |
| 4+3                             | 2903 (14.7%)                     | 683 (23.5%)                             |
| 4+3 Tert.5                      | 1187 (6%)                        | 487 (41%)                               |
| ≥4+4                            | 999 (5.1%)                       | 531 (53.2%)                             |
| <b>pN stage</b>                 |                                  |                                         |
| pN0                             | 10636 (89.4%)                    | 2243 (21.1%)                            |
| pN+                             | 1255 (10.6%)                     | 700 (55.8%)                             |
| <b>Surgical margin</b>          |                                  |                                         |
| Negative                        | 14297 (80.8%)                    | 2307 (16.1%)                            |
| Positive                        | 3388 (19.2%)                     | 1304 (38.5%)                            |

NOTE: Numbers do not always add up to 17747 in the different categories because of cases with missing data. Abbreviation: AJCC, American Joint Committee on Cancer.
